# Supplementary material for: Unique synthesis of novel octahedral micro/nano-hierarchical LiFePO4 cages as an enhanced cathode material for lithium-ion batteries
Source: Royal Society of Chemistry journal article supplement (doi:10.1039/c5ta04146e), 2015-01-01
Supplement: c5ta04146e1.pdf [file c5ta04146e1.pdf]

**Supporting Information**

**Unique Synthesis of Novel Octahedral Micro/Nano Hierarchical LiFePO<sub>4</sub> Cages as an  
Enhanced Cathode Material for Lithium-ion Batteries**

*Wenxiang Li, Huijuan Zhang, Yanping Mu, Li Liu, Yu Wang\**

The State Key Laboratory of Mechanical Transmissions and the School of Chemistry and  
Chemical Engineering, Chongqing University, 174 Shazheng Street, Shapingba District,  
Chongqing City, P.R. China, 400044.

E-mail: wangy@cqu.edu.cn; prospectwy@gmail.com

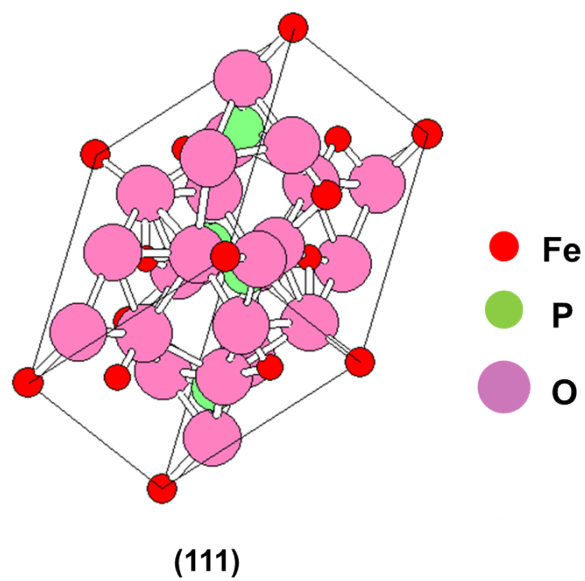

**Figure S1.** Crystal structure projection on the (111) plane of  $\text{Fe}_3(\text{PO}_4)_2(\text{OH})_2$  precursor.

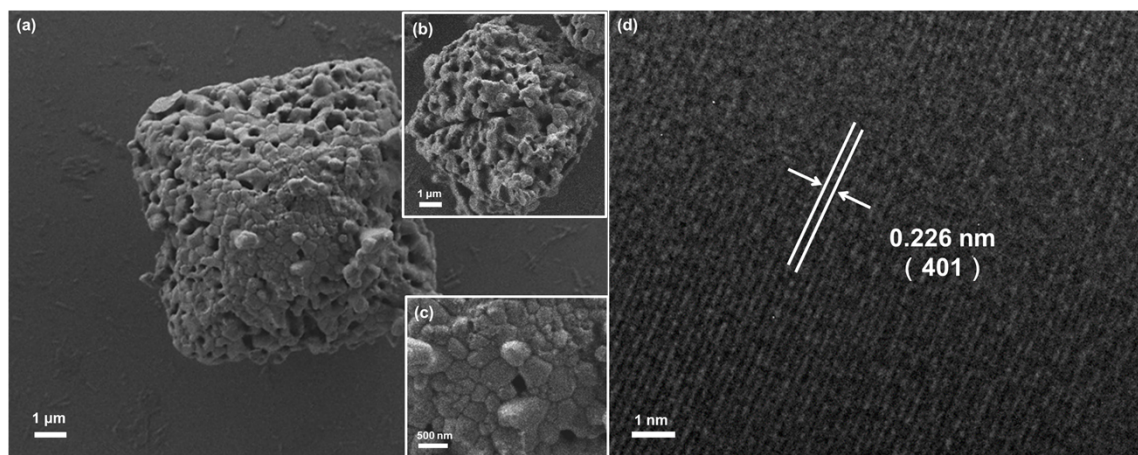

**Figure S2.** SEM (a) and HRTEM (d) images of octahedral micro/nano hierarchical  $\text{LiFePO}_4$  cages after long-term discharge/charge cycles. Inset: (b) Cross-sectional image of interstices in the octahedral cage by sonication. (c) Interstices on the octahedral cage surface.

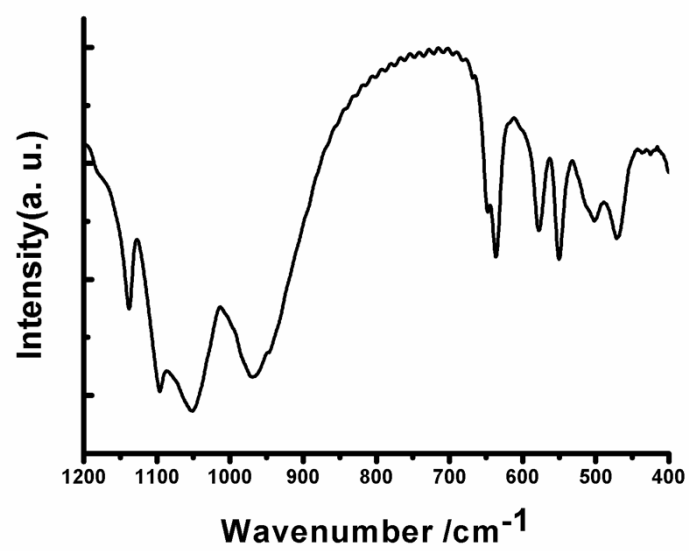

**Figure S3.** Fourier transformation infrared spectrum (FTIR) for octahedral micro/nano hierarchical LiFePO<sub>4</sub> cages.

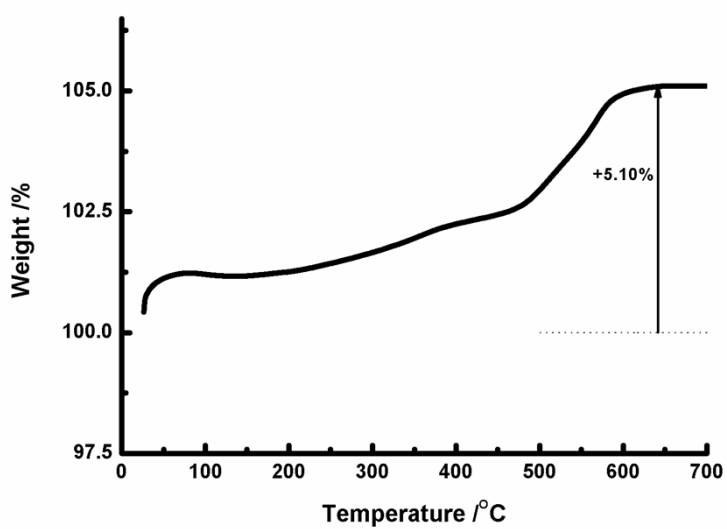

**Figure S4.** TG curve of the LiFePO<sub>4</sub> cages, obtained in oxygen from room temperature to 700 °C, at a heating rate of 10 K/min.

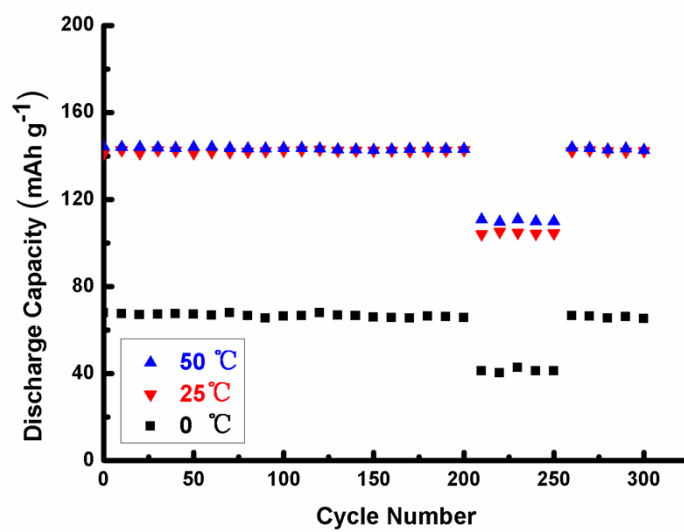

**Figure S5.** The temperature-dependent galvanostatic results of octahedral micro/nano hierarchical LiFePO<sub>4</sub> cages for cycled over 300 times at 0, 25 and 50 °C.

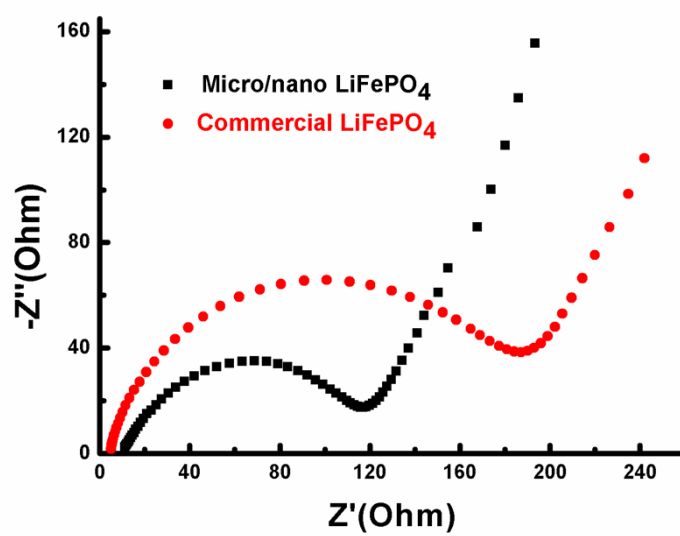

**Figure S6.** Electrochemical impedance spectra (EIS) curves for micro/nano LiFePO<sub>4</sub> cages and commercial LiFePO<sub>4</sub> powders at the frequency from 0.1 Hz to 100 Hz.

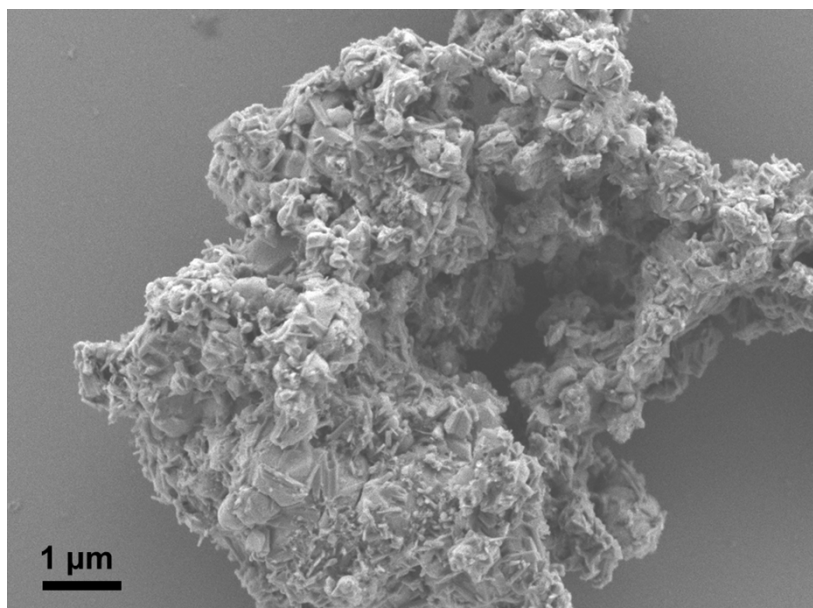

**Figure S7.** SEM image of commercial LiFePO<sub>4</sub> powders in this experiment for comparison.
